# Supplementary material for: Years of Life Lost (YLL) in Colombia 1998-2011: Overall and Avoidable Causes of Death Analysis
Source: PubMed Central journal article supplement (PMC4420276; doi:10.1371/journal.pone.0125456), 2015-05-05
Supplement: pone.0125456.s001.pdf [file pone.0125456.s001.pdf]

## Supporting Information

**S1 Table. Recodification of garbage codes in the GBD 2010 groups.**

| Garbage codes                            | GBD codes                           | ICD-10 codes                                                                                                                                                                                                                                                                                                                                                                                                                                                                 |
|------------------------------------------|-------------------------------------|------------------------------------------------------------------------------------------------------------------------------------------------------------------------------------------------------------------------------------------------------------------------------------------------------------------------------------------------------------------------------------------------------------------------------------------------------------------------------|
| <b>Septicaemia</b>                       | Other infectious diseases           | A267, A327, A400, A401, A402, A403, A408, A409, A410, A411, A412, A413, A414, A415, A418, A419, A427, B377                                                                                                                                                                                                                                                                                                                                                                   |
|                                          | Other salmonella infections         | A021                                                                                                                                                                                                                                                                                                                                                                                                                                                                         |
| <b>Ill-defined codes from A00-B99</b>    | Cirrhosis of the liver              | B189                                                                                                                                                                                                                                                                                                                                                                                                                                                                         |
|                                          | Encephalitis                        | A86X                                                                                                                                                                                                                                                                                                                                                                                                                                                                         |
|                                          | Fungal skin diseases                | B369                                                                                                                                                                                                                                                                                                                                                                                                                                                                         |
|                                          | Other diarrheal diseases            | A049, A059, A079, A084                                                                                                                                                                                                                                                                                                                                                                                                                                                       |
|                                          | Other infectious diseases           | A209, A219, A229, A239, A244, A269, A279, A289, A319, A329, A429, A439, A449, A480, A490, A491, A492, A493, A498, A499, A669, A679, A699, A749, A819, A89X, A99X, B259, B279, B309, B340, B341, B342, B343, B344, B348, B349, B379, B382, B389, B399, B409, B419, B429, B439, B449, B459, B465, B479, B49X, B950, B951, B952, B953, B954, B955, B956, B957, B958, B960, B961, B962, B963, B964, B965, B966, B967, B968, B970, B971, B972, B973, B974, B975, B976, B977, B978 |
|                                          | Other meningitis                    | A879                                                                                                                                                                                                                                                                                                                                                                                                                                                                         |
|                                          | Other neglected tropical diseases   | A689, A759, A779, A799, A94X                                                                                                                                                                                                                                                                                                                                                                                                                                                 |
|                                          | Other sexually transmitted diseases | A64X                                                                                                                                                                                                                                                                                                                                                                                                                                                                         |
|                                          | Viral skin diseases                 | B009                                                                                                                                                                                                                                                                                                                                                                                                                                                                         |
| <b>Cardiogenic shock and other shock</b> | Other infectious diseases           | A483                                                                                                                                                                                                                                                                                                                                                                                                                                                                         |
| <b>B19, Unspecified viral hepatitis</b>  | Other infectious diseases           | B190, B199                                                                                                                                                                                                                                                                                                                                                                                                                                                                   |
| <b>Pneumonitis</b>                       | Other chronic respiratory diseases  | J677, J678, J679, J680                                                                                                                                                                                                                                                                                                                                                                                                                                                       |
|                                          | Other infectious diseases           | B250                                                                                                                                                                                                                                                                                                                                                                                                                                                                         |
|                                          | Pneumoconiosis                      | J690, J691, J698                                                                                                                                                                                                                                                                                                                                                                                                                                                             |
| <b>All unspecified</b>                   | Other infectious diseases           | B589, B64X, B689, B820, B829, B89X                                                                                                                                                                                                                                                                                                                                                                                                                                           |

| <b>Garbage codes</b>                              | <b>GBD codes</b>                                          | <b>ICD-10 codes</b>                                                                                                                                                                                                                                                                                                    |
|---------------------------------------------------|-----------------------------------------------------------|------------------------------------------------------------------------------------------------------------------------------------------------------------------------------------------------------------------------------------------------------------------------------------------------------------------------|
| <b>parasitic diseases</b>                         | Other neglected tropical diseases                         | B719, B749, B789, B839                                                                                                                                                                                                                                                                                                 |
| <b>Sequela of different diseases and injuries</b> | Gall bladder and bile duct disease                        | K870, K871                                                                                                                                                                                                                                                                                                             |
|                                                   | Injuries with undetermined intent                         | Y872, Y899                                                                                                                                                                                                                                                                                                             |
|                                                   | Ischemic stroke                                           | I694, I698                                                                                                                                                                                                                                                                                                             |
|                                                   | Other chronic respiratory diseases                        | J990, J991, J998                                                                                                                                                                                                                                                                                                       |
|                                                   | Other digestive diseases                                  | K238, K678, K910, K911, K912, K913, K914, K915, K918, K919, K938                                                                                                                                                                                                                                                       |
|                                                   | Other endocrine, nutritional, blood, and immune disorders | E68X, E890, E891, E892, E893, E894, E895, E896, E898, E899                                                                                                                                                                                                                                                             |
|                                                   | Other gynecological diseases                              | N950, N951, N952, N953, N958, N990, N991, N992, N993, N994, N995, N998, N999                                                                                                                                                                                                                                           |
|                                                   | Other infectious diseases                                 | B942, B948, B949, G09X                                                                                                                                                                                                                                                                                                 |
|                                                   | Other musculoskeletal disorders                           | M032, M036, M074, M075, M076, M091, M092, M140, M141, M143, M144, M145, M146, M148, M360, M361, M362, M363, M364, M368, M490, M491, M492, M493, M494, M495, M498, M630, M631, M632, M633, M638, M738, M840, M841, M842, M901, M902, M903, M904, M905, M906, M907, M908, M960, M961, M962, M963, M964, M965, M966, M968 |
|                                                   | Other neurological disorders                              | G130, G131, G132, G138, G530, G531, G532, G533, G550, G551, G552, G553, G558, G590, G598, G730, G731, G732, G733, G734, G735, G736, G737, G970, G971, G972, G978, G979, G990, G991, G992, G998                                                                                                                         |
|                                                   | Other nutritional deficiencies                            | E642, E643, E648, E649                                                                                                                                                                                                                                                                                                 |
|                                                   | Other sense organ diseases                                | H590, H598                                                                                                                                                                                                                                                                                                             |
|                                                   | Other skin and subcutaneous diseases                      | L998                                                                                                                                                                                                                                                                                                                   |
|                                                   | Other urinary diseases                                    | N080, N081, N082, N084, N085, N088, N140, N141, N142, N143, N144, N160, N161, N162, N163, N164, N165, N168,                                                                                                                                                                                                            |

| <b>Garbage codes</b>                                                             | <b>GBD codes</b>                                     | <b>ICD-10 codes</b>                                              |
|----------------------------------------------------------------------------------|------------------------------------------------------|------------------------------------------------------------------|
|                                                                                  |                                                      | N250, N251, N258, N259, N291, N298, N338, N350, N351, N370, N378 |
|                                                                                  | Sense organ diseases                                 | H950, H951, H958, H959                                           |
|                                                                                  | Unintentional injuries other than transport injuries | Y859, Y86X                                                       |
| <b>B99, Other and unspecified bacterial and infectious diseases</b>              | Other infectious diseases                            | B99X                                                             |
| <b>C14,1-9, Other and ill- defined sites in the lip, oral cavity and pharynx</b> | Cancer of other part of pharynx and oropharinx       | C142, C148                                                       |
| <b>C26,0-9, Other and ill- defined sites in the lip, oral cavity and pharynx</b> | Other neoplasms                                      | C260, C261, C268, C269                                           |
| <b>C39,0-9,Other and ill- defined sites in the lip, oral cavity and pharynx</b>  | Other neoplasms                                      | C390, C398, C399                                                 |
| <b>C55,0-9, Uterus, part unspecified</b>                                         | Uterine cáncer                                       | C55X                                                             |
| <b>C57,9, Female genital organ unspecified</b>                                   | Other neoplasms                                      | C579                                                             |
| <b>C63,9, Male genital organ unspecified</b>                                     | Other neoplasms                                      | C639                                                             |
| <b>C68,9, Urinary organ unspecified</b>                                          | Other neoplasms                                      | C689                                                             |
| <b>C75,9, Endocrine gland unspecified</b>                                        | Other neoplasms                                      | C759                                                             |
| <b>C76,0-9, Malignant neoplasm of other and ill- defined sites</b>               | Other neoplasms                                      | C760, C761, C762, C763, C764, C765, C767, C768                   |
| <b>C80,0-9, Malignant neoplasm without specification of site</b>                 | Other neoplasms                                      | C80X                                                             |
| <b>All unspecified site in situ carcinoma and unspecified site Neoplasm of</b>   | Brain and nervous system cancers                     | D429, D432, D439                                                 |
|                                                                                  | Breast cancer                                        | D059                                                             |

| <b>Garbage codes</b>                                           | <b>GBD codes</b>                                          | <b>ICD-10 codes</b>                                                                                                                      |
|----------------------------------------------------------------|-----------------------------------------------------------|------------------------------------------------------------------------------------------------------------------------------------------|
| <b>uncertain or unknown behavior</b>                           | Cervical cancer                                           | D069                                                                                                                                     |
|                                                                | Malignant melanoma of skin                                | D033, D039                                                                                                                               |
|                                                                | Non melanoma skin cancer                                  | D043, D049                                                                                                                               |
|                                                                | Other neoplasms                                           | D014, D019, D024, D073, D076, D091, D099, D379, D386, D399, D409, D419, D449                                                             |
| <b>Ill-defined codes from D10-D36,9</b>                        | Other neoplasms                                           | D103, D105, D109, D126, D133, D144, D159, D179, D180, D181, D199, D229, D239, D269, D289, D299, D309, D316, D319, D329, D339, D359, D369 |
| <b>DIC, cardiac arrest, acute respiratory failure and coma</b> | Other cardiovascular and circulatory diseases             | I460, I461, I469                                                                                                                         |
|                                                                | Other endocrine, nutritional, blood, and immune disorders | D65X                                                                                                                                     |
|                                                                | Other Lower respiratory infections                        | J960                                                                                                                                     |
| <b>All encephalopathy and cerebral edema</b>                   | Encephalitis                                              | G050, G051, G052, G058                                                                                                                   |
|                                                                | Hemorrhagic and other nonischemic stroke                  | I64X                                                                                                                                     |
|                                                                | Other neurological disorders                              | G92X, G930, G931, G932, G933, G934, G935, G936, G937, G938, G939, G948                                                                   |
|                                                                | Other nutritional deficiencies                            | E512                                                                                                                                     |
| <b>E85, Amyloidosis</b>                                        | Other endocrine, nutritional, blood, and immune disorders | E850, E851, E852, E853, E854, E858, E859                                                                                                 |
| <b>All disorders of electrolyte &amp; fluid balance</b>        | Other endocrine, nutritional, blood, and immune disorders | E86X, E870, E871, E872, E873, E874, E875, E876, E877, E878                                                                               |
| <b>E889, Metabolic disorder unspecified</b>                    | Other endocrine, nutritional, blood, and immune disorders | E889                                                                                                                                     |
| <b>Ill-defined codes from F32-F99</b>                          | Other mental and behavioral disorders                     | F349, F39X, F459, F489, F519, F539, F609, F639, F649, F659, F669, F69X, F819, F849, F89X, F939, F949, F959, F989, F99X                   |
| <b>Ill-defined codes from G43-G58,9</b>                        | Other neurological disorders                              | G479, G509, G519, G529, G538, G542, G543, G544, G549, G569, G578, G589                                                                   |
| <b>Different paralytic syndrome and palsy</b>                  | Other neurological disorders                              | G800, G801, G802, G803, G804, G808, G809, G810, G811, G819, G820, G821,                                                                  |

| <b>Garbage codes</b>                                     | <b>GBD codes</b>                              | <b>ICD-10 codes</b>                                                                                                                                                                                                                                                                                                          |
|----------------------------------------------------------|-----------------------------------------------|------------------------------------------------------------------------------------------------------------------------------------------------------------------------------------------------------------------------------------------------------------------------------------------------------------------------------|
| <b>syndrome</b>                                          |                                               | G822, G823, G824, G825, G830, G831, G832, G833, G834, G838, G839                                                                                                                                                                                                                                                             |
| <b>All hydrocephalus</b>                                 | Other neurological disorders                  | G910, G911, G912, G913, G918, G919, G940, G941, G942                                                                                                                                                                                                                                                                         |
| <b>Ill-defined codes from H00-H99</b>                    | Cataracts                                     | H281, H282, H288                                                                                                                                                                                                                                                                                                             |
|                                                          | Other hearing loss                            | H919                                                                                                                                                                                                                                                                                                                         |
|                                                          | Other sense organ diseases                    | H019, H029, H030, H031, H038, H049, H059, H060, H061, H063, H103, H109, H119, H131, H132, H138, H159, H169, H179, H189, H190, H192, H193, H198, H209, H219, H279, H439, H449, H450, H451, H458, H470, H471, H477, H579, H580, H581, H588, H599, H609, H619, H699, H729, H739, H749, H750, H758, H809, H819, H82X, H839, H939 |
|                                                          | Other vision loss                             | H309, H319, H320, H328, H349, H359, H539, H547                                                                                                                                                                                                                                                                               |
|                                                          | Sense organ diseases                          | H220, H221, H228, H368, H480, H481, H488, H940, H948                                                                                                                                                                                                                                                                         |
| <b>Hypertension</b>                                      | Hypertensive heart disease                    | I10X, I150, I151, I152, I158, I159                                                                                                                                                                                                                                                                                           |
| <b>Pulmonary embolism</b>                                | Other cardiovascular and circulatory diseases | I260, I269                                                                                                                                                                                                                                                                                                                   |
| <b>I27, 1, Kyphoscoliotic heart disease</b>              | Other cardiovascular and circulatory diseases | I271                                                                                                                                                                                                                                                                                                                         |
| <b>All ill-defined descriptions of heart disease</b>     | Other cardiovascular and circulatory diseases | I279, I309, I319, I320, I321, I328, I349, I359, I369, I379, I38X, I390, I391, I392, I393, I394, I398, I510, I511, I512, I513, I514, I515, I516, I517, I518, I519                                                                                                                                                             |
| <b>I31, 2, Haemopericardium not classified elsewhere</b> | Other cardiovascular and circulatory diseases | I312                                                                                                                                                                                                                                                                                                                         |
| <b>I31, 3, Pericardial effusion (noninflammatory)</b>    | Other cardiovascular and circulatory diseases | I313                                                                                                                                                                                                                                                                                                                         |
| <b>All cardiac conduction disorders</b>                  | Other cardiovascular and circulatory diseases | I440, I441, I442, I443, I444, I445, I446, I447, I450, I451, I452, I453, I454, I455, I456, I458, I459, I470, I471, I472, I479,                                                                                                                                                                                                |

| <b>Garbage codes</b>                                              | <b>GBD codes</b>                                    | <b>ICD-10 codes</b>                                                                                                                                                                                                                            |
|-------------------------------------------------------------------|-----------------------------------------------------|------------------------------------------------------------------------------------------------------------------------------------------------------------------------------------------------------------------------------------------------|
|                                                                   |                                                     | I490, I491, I492, I493, I494, I495, I498, I499                                                                                                                                                                                                 |
| <b>I50, Heart failure</b>                                         | Other cardiovascular and circulatory diseases       | I500, I501, I509                                                                                                                                                                                                                               |
| <b>Atherosclerosis</b>                                            | Peripheral vascular disease                         | I700, I701, I709                                                                                                                                                                                                                               |
| <b>Embolism &amp; thrombosis</b>                                  | Other cardiovascular and circulatory diseases       | I740, I741, I742, I743, I744, I745, I748, I749, I81X, I822, I823, I828, I829                                                                                                                                                                   |
| <b>I99, Other and unspecified disorders of circulatory system</b> | Other cardiovascular and circulatory diseases       | I99X                                                                                                                                                                                                                                           |
| <b>Ill-defined codes from J30-J35,9</b>                           | Other chronic respiratory diseases                  | J304, J329, J339, J359                                                                                                                                                                                                                         |
| <b>J80, Adult respiratory distress syndrome</b>                   | Interstitial lung disease and pulmonary sarcoidosis | J80X                                                                                                                                                                                                                                           |
| <b>J81, Pulmonary oedema</b>                                      | Interstitial lung disease and pulmonary sarcoidosis | J81X                                                                                                                                                                                                                                           |
| <b>Thorax and pleural problem</b>                                 | Other chronic respiratory diseases                  | J90X, J91X, J920, J929, J930, J931, J938, J939, J940, J941, J942, J948, J949                                                                                                                                                                   |
|                                                                   | Other Lower respiratory infections                  | J860, J869                                                                                                                                                                                                                                     |
| <b>J98, 9, Respiratory disorder unspecified</b>                   | Other Lower respiratory infections                  | J961, J969, J981, J982, J983, J989                                                                                                                                                                                                             |
| <b>Ill-defined codes from K00-K14,9</b>                           | Other digestive diseases                            | K009, K039, K049, K069, K074, K079, K089, K099, K109, K119, K149                                                                                                                                                                               |
| <b>K65, Peritonitis</b>                                           | Other digestive diseases                            | K650, K658, K659                                                                                                                                                                                                                               |
| <b>Unspecified liver disease</b>                                  | Cirrhosis of the liver                              | K769                                                                                                                                                                                                                                           |
| <b>GI signs and symptoms</b>                                      | Other digestive diseases                            | K920, K921                                                                                                                                                                                                                                     |
| <b>K92,9, Disease of digestive system unspecified</b>             | Other digestive diseases                            | K929                                                                                                                                                                                                                                           |
| <b>Ill-defined codes from L01-L98, 9</b>                          | Other skin and subcutaneous diseases                | L109, L119, L129, L139, L14X, L309, L439, L449, L45X, L519, L539, L540, L548, L559, L569, L589, L599, L609, L620, L628, L649, L659, L669, L679, L689, L719, L729, L739, L749, L759, L819, L859, L86X, L879, L909, L919, L929, L949, L959, L989 |

| Garbage codes                                                           | GBD codes                                   | ICD-10 codes                                                                                                                                                                                                                                                                                                                 |
|-------------------------------------------------------------------------|---------------------------------------------|------------------------------------------------------------------------------------------------------------------------------------------------------------------------------------------------------------------------------------------------------------------------------------------------------------------------------|
| <b>Ill-defined codes from M09-M99</b>                                   | Other musculoskeletal disorders             | M098, M119, M130, M139, M206, M219, M229, M239, M249, M259, M319, M329, M339, M349, M359, M402, M405, M419, M429, M439, M464, M609, M619, M629, M659, M665, M679, M709, M719, M729, M759, M769, M779, M790, M792, M793, M799, M839, M849, M859, M879, M889, M899, M939, M949, M959, M969, M999                               |
| <b>Osteomyelitis</b>                                                    | Other musculoskeletal disorders             | M462, M860, M861, M862, M863, M864, M865, M866, M868, M869                                                                                                                                                                                                                                                                   |
| <b>N17-N19, Renal failure</b>                                           | Chronic kidney diseases unspecified         | N170, N171, N172, N178, N179, N180, N188, N189, N19X                                                                                                                                                                                                                                                                         |
| <b>Ill-defined codes from N39,3-N97,8</b>                               | Other gynecological diseases                | N609, N649, N759, N770, N771, N778, N829, N832, N839, N849, N859, N879, N889, N893, N899, N903, N909, N912, N915, N926, N939, N946, N949, N959                                                                                                                                                                               |
|                                                                         | Other urinary diseases                      | N399, N419, N429, N433, N489, N499, N510, N511, N512, N518                                                                                                                                                                                                                                                                   |
|                                                                         | Sexually transmitted diseases excluding HIV | N709, N719, N732, N735, N739                                                                                                                                                                                                                                                                                                 |
| <b>P96,9, Condition originating in the perinatal period unspecified</b> | Other neonatal disorders                    | P95X, P969                                                                                                                                                                                                                                                                                                                   |
| <b>Ill-defined codes from Q10-Q84,9</b>                                 | Congenital heart anomalies                  | Q209, Q219, Q229, Q239, Q249, Q259, Q264, Q269, Q279, Q289                                                                                                                                                                                                                                                                   |
|                                                                         | Other congenital anomalies                  | Q129, Q139, Q149, Q159, Q169, Q179, Q189, Q309, Q319, Q339, Q349, Q399, Q403, Q409, Q419, Q429, Q438, Q439, Q459, Q519, Q529, Q539, Q549, Q559, Q563, Q564, Q602, Q605, Q613, Q619, Q639, Q649, Q652, Q655, Q659, Q669, Q699, Q709, Q719, Q729, Q730, Q738, Q749, Q759, Q769, Q779, Q789, Q799, Q809, Q819, Q829, Q839, Q849 |
| <b>Q89,9, Congenital malformations unspecified</b>                      | Other congenital anomalies                  | Q899                                                                                                                                                                                                                                                                                                                         |
| <b>Q99,9, Chromosomal abnormality unspecified</b>                       | Other chromosomal abnormalities             | Q999                                                                                                                                                                                                                                                                                                                         |
| <b>All unspecified transport and road</b>                               | Motorized vehicle with three or more wheels | V393, V399, V493, V499, V593, V598, V599, V693, V699, V793, V799                                                                                                                                                                                                                                                             |

| Garbage codes                                          | GBD codes                            | ICD-10 codes                                                                                                                                                                                                                                                                                                                                                                                                                                                                                                                                                                                                                                                                                                                                                                                                                                                                                                                                                                                                                                                                                                                                                                                                                        |
|--------------------------------------------------------|--------------------------------------|-------------------------------------------------------------------------------------------------------------------------------------------------------------------------------------------------------------------------------------------------------------------------------------------------------------------------------------------------------------------------------------------------------------------------------------------------------------------------------------------------------------------------------------------------------------------------------------------------------------------------------------------------------------------------------------------------------------------------------------------------------------------------------------------------------------------------------------------------------------------------------------------------------------------------------------------------------------------------------------------------------------------------------------------------------------------------------------------------------------------------------------------------------------------------------------------------------------------------------------|
| <b>injuries</b>                                        | Motorized vehicle with two wheels    | V293, V299                                                                                                                                                                                                                                                                                                                                                                                                                                                                                                                                                                                                                                                                                                                                                                                                                                                                                                                                                                                                                                                                                                                                                                                                                          |
|                                                        | Other transport injury               | V819, V890, V891, V899, V99X                                                                                                                                                                                                                                                                                                                                                                                                                                                                                                                                                                                                                                                                                                                                                                                                                                                                                                                                                                                                                                                                                                                                                                                                        |
|                                                        | Pedal cycle vehicle                  | V193, V199                                                                                                                                                                                                                                                                                                                                                                                                                                                                                                                                                                                                                                                                                                                                                                                                                                                                                                                                                                                                                                                                                                                                                                                                                          |
|                                                        | Pedestrian injury by road vehicle    | V093, V099                                                                                                                                                                                                                                                                                                                                                                                                                                                                                                                                                                                                                                                                                                                                                                                                                                                                                                                                                                                                                                                                                                                                                                                                                          |
|                                                        | Road injury other                    | V809, V829, V892, V893                                                                                                                                                                                                                                                                                                                                                                                                                                                                                                                                                                                                                                                                                                                                                                                                                                                                                                                                                                                                                                                                                                                                                                                                              |
| <b>X84, Intentional self-harm by unspecified means</b> | Self-harm and interpersonal violence | X840, X841, X842, X843, X844, X845, X846, X847, X848, X849                                                                                                                                                                                                                                                                                                                                                                                                                                                                                                                                                                                                                                                                                                                                                                                                                                                                                                                                                                                                                                                                                                                                                                          |
| <b>Y09, Assault by unspec. means</b>                   | Assault by other means               | Y090, Y091, Y092, Y093, Y094, Y095, Y096, Y097, Y098, Y099                                                                                                                                                                                                                                                                                                                                                                                                                                                                                                                                                                                                                                                                                                                                                                                                                                                                                                                                                                                                                                                                                                                                                                          |
| <b>All undetermined intentional or unintentional</b>   | Injuries with undetermined intent    | Y100, Y101, Y102, Y103, Y104, Y105, Y106, Y107, Y108, Y109, Y110, Y111, Y112, Y113, Y114, Y115, Y116, Y117, Y118, Y119, Y120, Y121, Y122, Y123, Y124, Y125, Y126, Y127, Y128, Y129, Y130, Y131, Y132, Y133, Y134, Y135, Y136, Y137, Y138, Y139, Y140, Y141, Y142, Y143, Y144, Y145, Y146, Y147, Y148, Y149, Y150, Y151, Y152, Y153, Y154, Y155, Y156, Y157, Y158, Y160, Y161, Y162, Y163, Y164, Y165, Y166, Y167, Y168, Y169, Y170, Y171, Y172, Y173, Y174, Y175, Y176, Y177, Y178, Y179, Y180, Y181, Y182, Y183, Y184, Y185, Y186, Y187, Y188, Y189, Y190, Y191, Y192, Y193, Y194, Y195, Y196, Y197, Y198, Y199, Y200, Y201, Y202, Y203, Y204, Y205, Y206, Y207, Y208, Y209, Y210, Y211, Y212, Y213, Y214, Y215, Y216, Y217, Y218, Y219, Y220, Y221, Y222, Y223, Y224, Y225, Y226, Y227, Y228, Y229, Y230, Y231, Y232, Y233, Y234, Y235, Y236, Y237, Y238, Y239, Y240, Y241, Y242, Y243, Y244, Y245, Y246, Y247, Y248, Y249, Y250, Y251, Y252, Y253, Y254, Y255, Y256, Y257, Y258, Y259, Y260, Y261, Y262, Y263, Y264, Y265, Y266, Y267, Y268, Y269, Y270, Y271, Y272, Y273, Y274, Y275, Y276, Y277, Y278, Y279, Y280, Y281, Y282, Y283, Y284, Y285, Y286, Y287, Y288, Y289, Y290, Y291, Y292, Y293, Y294, Y295, Y296, Y297, Y298, |

| Garbage codes | GBD codes | ICD-10 codes                                                                                                                                                                                                                                                                                                                                   |
|---------------|-----------|------------------------------------------------------------------------------------------------------------------------------------------------------------------------------------------------------------------------------------------------------------------------------------------------------------------------------------------------|
|               |           | Y299, Y300, Y301, Y302, Y303, Y304,<br>Y305, Y306, Y307, Y308, Y309, Y310,<br>Y311, Y312, Y313, Y314, Y315, Y316,<br>Y317, Y318, Y319, Y320, Y321, Y322,<br>Y323, Y324, Y325, Y326, Y327, Y328,<br>Y329, Y330, Y331, Y332, Y333, Y334,<br>Y335, Y336, Y337, Y337, Y338, Y339,<br>Y340, Y341, Y342, Y343, Y344, Y345,<br>Y346, Y347, Y348, Y349 |
